# Supplementary material
Source: PubMed Central journal article supplement (PMC8941893)
Supplement: spectrum02564-21_supp_1_seq1.pdf [file spectrum02564-21_supp_1_seq1.pdf]

## SUPPLEMENTAL

The screenshot displays the VPipe Viral Analysis Pipeline interface. The top left features the VPipe logo and the text 'Viral Analysis Pipeline'. A search bar is located in the top right. The main interface is divided into a left sidebar and a main content area. The sidebar contains a 'Sort by' section with a dropdown menu set to 'Contig Length' and options for 'Ascending' and 'Descending'. Below this is a 'Filters' section with several filterable fields: 'Family', 'Accession', 'Taxonomy ID', 'Classification', 'Blast Description', 'Genus', and 'Minimum Percent Id'. The main content area shows a search path 'Search / Runs / Samples / Contigs' and a 'Download' button. It displays search results for 'Sample Id: CSID\_CUID\_Demo01 CSID\_CUID\_Demo02' and 'Run Id: 190225\_VPipe\_Demo\_Reads'. The results are filtered by 'Classification: viruses' and 'Genus: Norovirus'. A 'Contig Count: 8' is shown. The results table lists four contigs with their respective sample IDs, lengths, classifications, and read counts. The first two contigs are selected with checkmarks.

| Contig ID | Sample Id        | Length | Classification                                                                             | Read Count |
|-----------|------------------|--------|--------------------------------------------------------------------------------------------|------------|
| Contig001 | CSID_CUID_Demo02 | 7654   | Caliciviridae   Norovirus   Norwalk virus   Norovirus GII                                  | 7606.11... |
| Contig001 | CSID_CUID_Demo01 | 7561   | Caliciviridae   Norovirus   Norwalk virus   Norovirus Hu/GII.4/Hong Kong/CUHK3630/2012/CHN | 7561       |
| Contig020 | CSID_CUID_Demo01 | 2198   | Caliciviridae   Norovirus   Norwalk virus   Norovirus GII                                  | 2198       |
| Contig032 | CSID_CUID_Demo01 | 1754   | Caliciviridae   Norovirus   Norwalk virus   Norovirus GII                                  | 1754       |

**Figure S1. Example of sorting and filtering options for identifying contigs of interest in the VPipe graphical user interface.** Users have the option of viewing contig assembly and BLASTN results for multiple samples in a given run; in the example screenshot, contig results are shown for samples “CSID\_CUID\_Demo01” and “CSID\_CUID\_Demo02” (blue box). Contig results for the samples are sorted by contig length in descending order (red box), and two filters are applied (orange boxes) to limit the viewed results to contigs with BLASTN matches to “Genus: Norovirus” and “Classification: viruses” (default filter). Filters can be added and removed by users on demand. Contigs selected with the check box (in this case both “Contig001” for the two samples shown) can be downloaded by clicking the blue “Download” button in the top right corner.

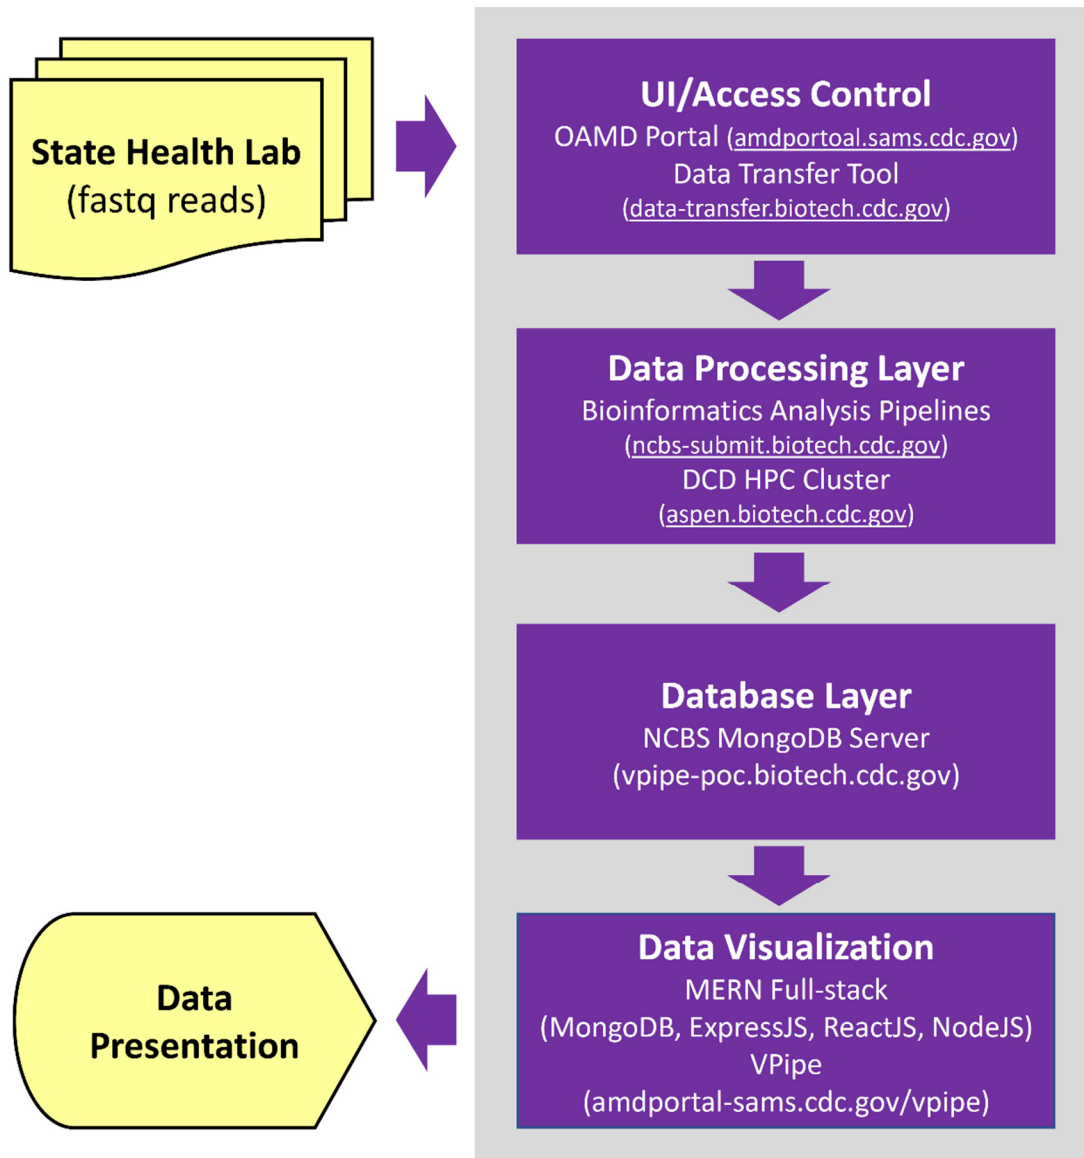

**Figure S2. VPipe system architecture:** VPipe has multiple components coordinating data flow from public health partners: (1) The User Interface layer incorporating Access Control and the Data Transfer Tool (2) Data Processing Layer to execute NGS data workflows; (3) Database layer and data ingestion in MongoDB; (4) Data Visualization on a web page through MERN Full-stack (MongoDB, ExpressJS, ReactJS, NodeJS) architecture.

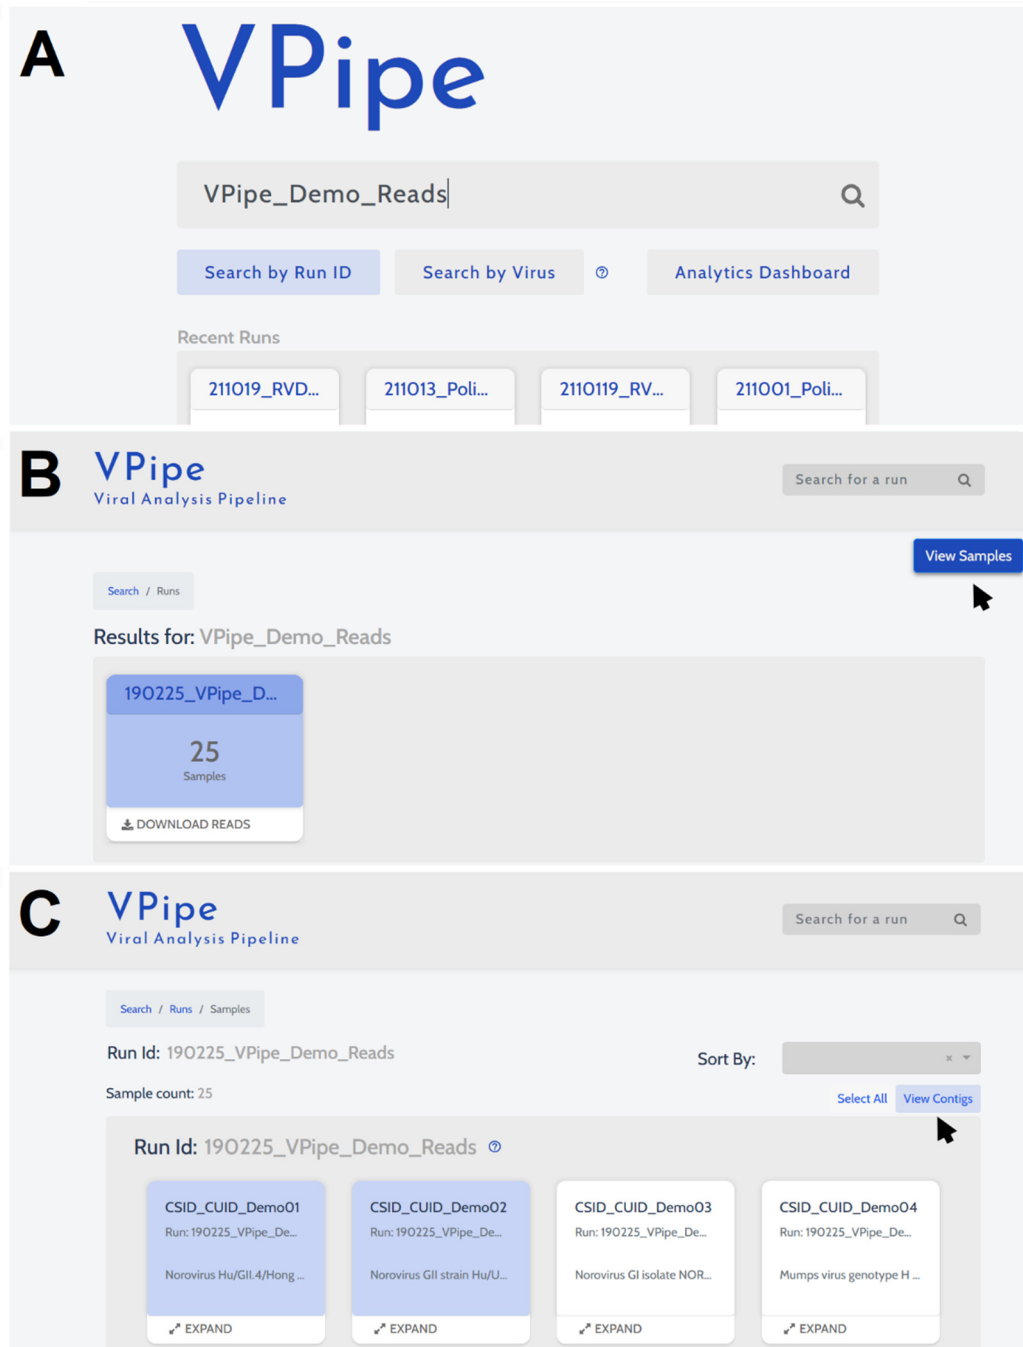

**Figure S3. Examples of accessing VPipe run and sample data starting from landing page.**

**A)** Entering substring of a run name, “VPipe\_Demo\_Reads”, on the landing page. **B)** Selected run shown with “View Samples” button (right) being selected. **C)** Samples Page with samples “CSID\_CUID\_Demo01” and “CSID\_CUID\_Demo02” selected along with the “View Contigs” button.

**Table S1.** Percent reference genome coverage for target virus assembly using VPipe, VirMAP and Genome Detective.

| SRA Dataset | Target Virus                   | Complete NCBI Genome Match | Percent Coverage of Complete Genome by Maximum Contig |            |                      |
|-------------|--------------------------------|----------------------------|-------------------------------------------------------|------------|----------------------|
|             |                                |                            | VPipe                                                 | VirMAP (1) | Genome Detective (2) |
| SRR1553609  | Ebola virus                    | KM233083                   | 99.9%                                                 | 99.8%      | 40.0%                |
| SRR1170797  | bovine viral diarrhea virus 2  | KT832817                   | 71.3%                                                 | 95.6%      | 69.3%                |
| SRR13403396 | enterovirus D94                | MT081370                   | 99.9%                                                 | 100%       | 98.9%                |
| SRR13402413 | enterovirus D70                | MT081369                   | 99.4%                                                 | 100%       | 100.0%               |
| SRR10298816 | human parechovirus 3           | MN781627                   | 98.2%                                                 | 99.9%      | 98.5%                |
| SRR10298815 | enterovirus A71                | MG976581                   | 93.4%                                                 | 100%       | 66.1%                |
| SRR10298813 | human parechovirus 3           | MN781627                   | 98.2%                                                 | 99.9%      | 30.6%                |
| SRR10298814 | Coxsackievirus B5              | MW015054                   | 70.0%                                                 | 99.2%      | 97.2%                |
| SRR1106548  | human immunodeficiency virus 1 | AB485634                   | 50.9%                                                 | 88.5%      | 44.6%                |
|             | <i>Microviridae</i>            | MH617085                   | 41%                                                   | 40%        | Not detected         |
|             | GB virus C                     | MK234885                   | 13.1%                                                 | 99.7%      | 97.1%                |
| SRR1106123  | hepatitis C virus              | EU234061                   | 54%                                                   | 99.0%      | 100.0%               |
|             | GB virus C                     | U45966                     | 95.6%                                                 | 98.5%      | 96.4%                |

**Table S2.** Rotavirus A (DRR049387) contig lengths generated using VPipe, and percent identity compared to rotavirus genomic segments as top BLASTN matches, ten of which are described in published genome sequencing studies (JQ087428-JQ087445 and KF371706-KF371984) (3, 4).

| Segment    | Length trimmed<br>from ends |         | Final Contig<br>Length | Published Rotavirus<br>Segments |          | % Identity<br>(trimmed) |
|------------|-----------------------------|---------|------------------------|---------------------------------|----------|-------------------------|
|            | from 5'                     | from 3' |                        | Accession<br>Number             | Length   |                         |
| Segment 1  | 96 bp                       | 64 bp   | 3,302 bp               | JQ087445                        | 3,302 bp | 99.4%                   |
| Segment 2  | 55 bp                       | 40 bp   | 2,735 bp               | KF371982                        | 2,735 bp | 99.7%                   |
| Segment 3  | 64 bp                       | 43 bp   | 2,591 bp               | KF371961                        | 2,591 bp | 99.3%                   |
| Segment 4  | 2 bp                        | 69 bp   | 2,359 bp               | KF371984                        | 2,359 bp | 99.8%                   |
| Segment 5  | 96 bp                       | 43 bp   | 1,558 bp               | KF371976                        | 1,558 bp | 99.6%                   |
| Segment 6  | 49 bp                       | 37 bp   | 1,356 bp               | KF371844                        | 1,356 bp | 99.9%                   |
| Segment 7  | 88 bp                       | 37 bp   | 1,072 bp               | KF371978                        | 1,072 bp | 99.8%                   |
| Segment 8  | 13 bp                       | 108 bp  | 1,019 bp               | JF490359                        | 1,019 bp | 99.4%                   |
| Segment 9  | 43 bp                       | 62 bp   | 1,062 bp               | JQ087428                        | 1,062 bp | 96.5%                   |
| Segment 10 | 10 bp                       | 42 bp   | 750 bp                 | KF371706                        | 750 bp   | 99.2%                   |
| Segment 11 | 0 bp                        | 2 bp    | 658 bp                 | JQ087444                        | 664 bp   | 99.4%                   |

**Table S3.** Rotavirus A (DRR049387) contig lengths generated using VirMap, and percent identity compared to rotavirus top BLASTN match genomic segments, ten of which are described in published genome sequencing studies (JQ087428-JQ087445 and KF371706-KF371984) (3, 4).

| Segment    | Length trimmed<br>from ends |         | Final Contig<br>Length | Published Rotavirus<br>Segments |          |                     |
|------------|-----------------------------|---------|------------------------|---------------------------------|----------|---------------------|
|            | from 5'                     | from 3' |                        | Accession<br>Number             | Length   | Percent<br>Identity |
| Segment 1  | 23 bp                       | 24 bp   | 3,302 bp               | JQ087434                        | 3,302 bp | 99.4%               |
| Segment 2  | 13 bp                       | 654 bp  | 2,735 bp               | KF371982                        | 2,735 bp | 99.3%               |
| Segment 3  | 50 bp                       | 18 bp   | 2,591 bp               | KF371961                        | 2,591 bp | 99.0%               |
| Segment 4  | 3 bp                        | 34 bp   | 2,359 bp               | KF371984                        | 2,359 bp | 99.8%               |
| Segment 5  | 9 bp                        | 41 bp   | 1,558 bp               | KF371976                        | 1,558 bp | 99.6%               |
| Segment 6  | 71 bp                       | 37 bp   | 1,356 bp               | KF371844                        | 1,356 bp | 99.9%               |
| Segment 7  | 166 bp                      | 10 bp   | 1,072 bp               | KF371978                        | 1,072 bp | 99.3%               |
| Segment 8  | 13 bp                       | 108 bp  | 1,019 bp               | JF490359                        | 1,019 bp | 99.4%               |
| Segment 9  | 189 bp                      | 99 bp   | 1,062 bp               | JQ087428                        | 1,062 bp | 96.5%               |
| Segment 10 | 16 bp                       | 0 bp    | 731 bp                 | KF371706                        | 750 bp   | 99.4%               |
| Segment 11 | 0 bp                        | 2 bp    | 658 bp                 | JQ087444                        | 664 bp   | 99.3%               |

**Table S4.** Rotavirus A (DRR049387) contig lengths generated using Genome Detective with percent identity compared to rotavirus top BLASTN match genomic segments, ten of which are described in published genome sequencing studies (JQ087428-JQ087445 and KF371706-KF371984) (3, 4).

| Segment    | Length trimmed<br>from ends |         | Final Contig<br>Length | Published Rotavirus<br>Segments |          | Percent<br>Identity |
|------------|-----------------------------|---------|------------------------|---------------------------------|----------|---------------------|
|            | from 5'                     | from 3' |                        | Accession<br>Number             | Length   |                     |
| Segment 1  | 0 bp                        | 0 bp    | 3,300 bp               | JQ087434                        | 3,302 bp | 99.4%               |
| Segment 2  | 0 bp                        | 0 bp    | 2,734 bp               | KF371982                        | 2,735 bp | 99.7%               |
| Segment 3  | 0 bp                        | 0 bp    | 2,589 bp               | KF371961                        | 2,591 bp | 99.3%               |
| Segment 4  | 0 bp                        | 0 bp    | 2,350 bp               | KF371984                        | 2,359 bp | 99.8%               |
| Segment 5  | 5 bp                        | 0 bp    | 1,558 bp               | KF371976                        | 1,558 bp | 99.6%               |
| Segment 6  | 0 bp                        | 0 bp    | 1,354 bp               | KF371844                        | 1,356 bp | 99.9%               |
| Segment 7  | 0 bp                        | 0 bp    | 1,070 bp               | KF371978                        | 1,072 bp | 99.8%               |
| Segment 8  | 0 bp                        | 17 bp   | 1,019 bp               | JF490359                        | 1,019 bp | 99.4%               |
| Segment 9  | 0 bp                        | 0 bp    | 1,060 bp               | JQ087428                        | 1,062 bp | 96.5%               |
| Segment 10 | 0 bp                        | 0 bp    | 744 bp                 | KF371706                        | 750 bp   | 99.1%               |
| Segment 11 | 0 bp                        | 0 bp    | 628 bp                 | JQ087444                        | 664 bp   | 99.7%               |

**Table S5.** Contig length and best BLASTN match for the Influenza A dataset (ERR690519)(5) assembled using VPipe and compared against top BLASTN matches, strain A/Porto Alegre/LACENRS-275/2013(H3N2) genomic segments.

| Segment   | Length trimmed from ends |         | Final Contig Length | Published Rotavirus Segments |          |                  |
|-----------|--------------------------|---------|---------------------|------------------------------|----------|------------------|
|           | from 5'                  | from 3' |                     | Accession Number             | Length   | Percent Identity |
| Segment 1 | 0 bp                     | 0 bp    | 2,297 bp            | KY925972                     | 2,341 bp | 99.4%            |
| Segment 2 | 0 bp                     | 6 bp    | 2,334 bp            | KY925623                     | 2,341 bp | 99.9%            |
| Segment 3 | 13 bp                    | 7 bp    | 2,233 bp            | KY926327                     | 2,233 bp | 99.4%            |
| Segment 4 | 0 bp                     | 3 bp    | 1,757 bp            | KY926033                     | 1,762 bp | 99.8%            |
| Segment 5 | 4 bp                     | 3 bp    | 1,566 bp            | KY925008                     | 1,566 bp | 99.6%            |
| Segment 6 | 0 bp                     | 0 bp    | 1,454 bp            | KY925852                     | 1,467 bp | 99.6%            |
| Segment 7 | 1 bp                     | 0 bp    | 1,026 bp            | KY925062                     | 1,027 bp | 99.4%            |
| Segment 8 | 0 bp                     | 0 bp    | 880 bp              | KY925490                     | 890 bp   | 99.7%            |



**Table S6.** Contig length and best BLASTN match for the Influenza A dataset (ERR690519)(5) assembled using VirMAP and compared against top BLASTN matches, strain A/Porto Alegre/LACENRS-275/2013(H3N2) genomic segments.

| Segment   | Length trimmed from ends |         | Final Contig Length | Published Rotavirus Segments |          |                  |
|-----------|--------------------------|---------|---------------------|------------------------------|----------|------------------|
|           | from 5'                  | from 3' |                     | Accession Number             | Length   | Percent Identity |
| Segment 1 | 0 bp                     | 0 bp    | 2,297 bp            | KY925972                     | 2,341 bp | 99.5%            |
| Segment 2 | 0 bp                     | 6 bp    | 2,340 bp            | KY925623                     | 2,341 bp | 99.8%            |
| Segment 3 | 13 bp                    | 7 bp    | 2,233 bp            | KY926327                     | 2,233 bp | 99.6%            |
| Segment 4 | 0 bp                     | 6 bp    | 1,757 bp            | KY926033                     | 1,762 bp | 99.8%            |
| Segment 5 | 4 bp                     | 6 bp    | 1,566 bp            | KY925008                     | 1,566 bp | 99.5%            |
| Segment 6 | 0 bp                     | 0 bp    | 1,456 bp            | KY925852                     | 1,467 bp | 99.6%            |
| Segment 7 | 1 bp                     | 0 bp    | 1,027 bp            | KY925062                     | 1,027 bp | 99.4%            |
| Segment 8 | 0 bp                     | 0 bp    | 880 bp              | KY925490                     | 890 bp   | 99.5%            |

**Table S7.** Longest contig generated using de novo and reference-based assembly. for 23 SARS-CoV-2 samples. De novo assemblies are manually trimmed to only regions which match the Wuhan reference (MN908947).

| Genbank ID          | De novo assembly                                                                                                                     |                                     |                    | Reference-based assembly |                                    |
|---------------------|--------------------------------------------------------------------------------------------------------------------------------------|-------------------------------------|--------------------|--------------------------|------------------------------------|
|                     | VPipe SPAdes Contigs                                                                                                                 | Trimmed bases not matching MN908947 | % MN908947 covered | Consensus length         | % Ambiguous Nucleotides in contigs |
| MZ391030            | 29,580 bp                                                                                                                            | 0 bp                                | 98.91%             | 29,903 bp                | 1.30%                              |
| MZ391031            | 29,531 bp                                                                                                                            | 151 bp                              | 98.76%             | 29,903 bp                | 1.31%                              |
| MZ391032            | 29,810 bp                                                                                                                            | 77 bp                               | 99.69%             | 29,903 bp                | 0.73%                              |
| MZ391033            | 29,543 bp                                                                                                                            | 0 bp                                | 98.80%             | 29,903 bp                | 2.61%                              |
| MZ391034            | 29,839 bp                                                                                                                            | 84 bp                               | 99.79%             | 29,903 bp                | 0.54%                              |
| MZ391035            | 29,589 bp                                                                                                                            | 190 bp                              | 98.95%             | 29,903 bp                | 1.40%                              |
| MZ391036            | 29,626 bp                                                                                                                            | 68 bp                               | 99.07%             | 29,903 bp                | 1.40%                              |
| MZ391037            | 29,828 bp                                                                                                                            | 123 bp                              | 99.75%             | 29,903 bp                | 0.42%                              |
| MZ391038            | 29,875 bp                                                                                                                            | 206 bp                              | 99.91%             | 29,903 bp                | 0.34%                              |
| MZ391039            | 29,819 bp                                                                                                                            | 0 bp                                | 99.72%             | 29,903 bp                | 2.61%                              |
| MZ391040            | 29,841 bp                                                                                                                            | 91 bp                               | 99.79%             | 29,903 bp                | 0.69%                              |
| MZ348328            | 29,136 bp                                                                                                                            | 151 bp                              | 97.44%             | 29,903 bp                | 1.58%                              |
| MZ348310            | 29,834 bp                                                                                                                            | 41 bp                               | 99.77%             | 29,903 bp                | 0.54%                              |
| MZ348329            | 29,136 bp                                                                                                                            | 119 bp                              | 97.44%             | 29,903 bp                | 3.19%                              |
| MZ391041            | 29,805 bp                                                                                                                            | 93 bp                               | 99.67%             | 29,903 bp                | 1.68%                              |
| MZ391042            | 18,901 bp and 11,058 bp                                                                                                              | 0 bp                                | 63.21%             | 29,903 bp                | 0.38%                              |
| MZ391043            | 29,845 bp                                                                                                                            | 73 bp                               | 99.81%             | 29,903 bp                | 0.54%                              |
| MZ391044            | 29,779 bp                                                                                                                            | 43 bp                               | 99.59%             | 29,904 bp*               | 22.47%                             |
| MZ391045            | 29,876 bp                                                                                                                            | 109 bp                              | 99.91%             | 29,903 bp                | 0.35%                              |
| MZ391046            | 29,859 bp                                                                                                                            | 114 bp                              | 99.85%             | 29,903 bp                | 0.54%                              |
| Isolate-RNA-1-Ct-20 | 29,726 bp                                                                                                                            | 240 bp                              | 99.41%             | 29,903 bp                | 1.43%                              |
| Isolate-RNA-2-Ct-26 | 12,361 bp, 11,027, and 5770 bp                                                                                                       | 340 bp                              | 41.34%             | 29,903 bp                | 6.93%                              |
| Isolate-RNA-3-Ct-29 | 6,057 bp, 4,612 bp, 2,876 bp, 2,832 bp, 1,414 bp, 1,351 bp, 1,344 bp, 1,248 bp, 1,234 bp, 790 bp, 612 bp, 604 bp, 534 bp, and 519 bp | 468 bp                              | 20.25%             | 29,903 bp                | 30.11%                             |

\*Manually trimmed to 29,903 bp (removed one masked base, N)

**Table S8.** Number of SNPs detected by the VPipe reference recruitment module and Genome Detective for 23 SARS-CoV-2 samples relative to the Wuhan reference (MN908947). VPipe FreeBayes SNPs generated with no minimum read cutoff for calling the consensus (VPipe consensus, no masking) and using a 25X minimum read cutoff (VPipe consensus, 25X filter) were compared by global alignment to the consensus generated by Genome Detective. Sample names in bold indicate SC2 genomes with 100% SNP concordance between the original consensus submitted to Genbank and the VPipe 25X filtered consensus.

| Genbank IDs         | SNP Counts                  |                             |                  | Concordance of SNPs                                         |                                                  |                    |
|---------------------|-----------------------------|-----------------------------|------------------|-------------------------------------------------------------|--------------------------------------------------|--------------------|
|                     | VPipe consensus, no masking | VPipe consensus, 25X filter | Genome Detective | VPipe consensus, no masking and VPipe consensus, 25X filter | VPipe consensus, 25X filter and Genome Detective | All three combined |
| MZ391030            | 20                          | 17                          | 15               | 17                                                          | 15                                               | 15                 |
| MZ391031            | 16                          | 15                          | 16               | 15                                                          | 15                                               | 15                 |
| MZ391032            | 23                          | 22                          | 24               | 22                                                          | 22                                               | 22                 |
| <b>MZ391033</b>     | 16                          | 15                          | 15               | 15                                                          | 15                                               | 15                 |
| <b>MZ391034</b>     | 24                          | 24                          | 24               | 24                                                          | 24                                               | 24                 |
| <b>MZ391035</b>     | 15                          | 15                          | 15               | 15                                                          | 15                                               | 15                 |
| MZ391036            | 17                          | 14                          | 14               | 14                                                          | 14                                               | 14                 |
| <b>MZ391037</b>     | 23                          | 23                          | 23               | 23                                                          | 23                                               | 23                 |
| <b>MZ391038</b>     | 25                          | 25                          | 24               | 25                                                          | 24                                               | 24                 |
| MZ391039            | 22                          | 18                          | 20               | 18                                                          | 18                                               | 18                 |
| <b>MZ391040</b>     | 21                          | 21                          | 20               | 21                                                          | 20                                               | 20                 |
| <b>MZ348328</b>     | 28                          | 26                          | 26               | 26                                                          | 26                                               | 26                 |
| <b>MZ348310</b>     | 19                          | 18                          | 18               | 18                                                          | 18                                               | 18                 |
| <b>MZ348329</b>     | 25                          | 24                          | 24               | 24                                                          | 24                                               | 24                 |
| MZ391041            | 28                          | 25                          | 26               | 25                                                          | 25                                               | 25                 |
| MZ391042            | 23                          | 20                          | 22               | 20                                                          | 20                                               | 20                 |
| MZ391043            | 22                          | 22                          | 21               | 22                                                          | 21                                               | 21                 |
| MZ391044            | 26                          | 15                          | 27               | 15                                                          | 15                                               | 15                 |
| <b>MZ391045</b>     | 27                          | 21                          | 21               | 21                                                          | 21                                               | 21                 |
| MZ391046            | 22                          | 18                          | 18               | 18                                                          | 18                                               | 18                 |
| Isolate-RNA-1-Ct-20 | 3                           | 3                           | 3                | 3                                                           | 3                                                | 3                  |
| Isolate-RNA-2-Ct-26 | 6                           | 3                           | 3                | 3                                                           | 3                                                | 3                  |
| Isolate-RNA-3-Ct-29 | 7                           | 4                           | 5                | 5                                                           | 4                                                | 4                  |

**Table S9.** VPipe application in published NGS studies (2016-2020)

| Study                                                                                                                                                                                                                         | Viral Species Detected                                      | No. Specimens Analyzed* | Specimen Type            | Reference |
|-------------------------------------------------------------------------------------------------------------------------------------------------------------------------------------------------------------------------------|-------------------------------------------------------------|-------------------------|--------------------------|-----------|
| High-throughput next-generation sequencing of polioviruses <sup>1</sup>                                                                                                                                                       | Enterovirus C                                               | 39                      | Isolates & Clinical      | (6)       |
| Detection and genomic characterization of enterovirus D68 in respiratory samples isolated in the United States in 2016 <sup>1</sup>                                                                                           | Enterovirus D                                               | 3                       | Clinical (NP)            | (7)       |
| Complete genome sequences of mumps and measles virus isolates from three states in the United States <sup>1</sup>                                                                                                             | Measles, Mumps                                              | 9                       | Isolates & Clinical      | (8)       |
| Genomic characterization of three melon necrotic spot viruses detected in human stool specimens <sup>1</sup>                                                                                                                  | Melon Necrotic Spot Viruses (MNSV)                          | 3                       | Clinical (ST)            | (9)       |
| Characterization of a salivirus ( <i>Picornaviridae</i> ) from a diarrheal child in Guatemala <sup>1</sup>                                                                                                                    | Salivirus                                                   | 1                       | Clinical (ST)            | (10)      |
| Complete genome sequences of human astrovirus prototype strains (types 1 to 8) <sup>1</sup>                                                                                                                                   | Astrovirus                                                  | 8                       | Isolates                 | (11)      |
| Genetic and epidemiologic trends of norovirus outbreaks in the United States from 2013 to 2016 demonstrated emergence of novel GII.4 recombinant viruses <sup>1</sup>                                                         | Norovirus                                                   | 4                       | Clinical (ST)            | (12)      |
| Near-complete genome sequences of several new norovirus genogroup II genotypes <sup>1</sup>                                                                                                                                   | Norovirus                                                   | 13                      | Clinical (ST)            | (13)      |
| Genomic sequence of the first porcine rotavirus group H strain in the United States <sup>1</sup>                                                                                                                              | Rotavirus                                                   | 3                       | Clinical (ST)            | (14)      |
| Genetic diversity of human sapovirus across the Americas <sup>1</sup>                                                                                                                                                         | Sapovirus                                                   | 68                      | Clinical (ST)            | (15)      |
| Near-complete human sapovirus genome sequences from Kenya <sup>1</sup>                                                                                                                                                        | Sapovirus                                                   | 5                       | Clinical (ST)            | (16)      |
| Whole-genome sequence of human rhinovirus C47, isolated from an adult respiratory illness outbreak in Butte County, California, 2017 <sup>2</sup>                                                                             | Rhinovirus C                                                | 1                       | Clinical (NP)            | (17)      |
| Genome sequences of rhinovirus genotype C56 detected in three patients with acute respiratory illness, California, 2016 to 2017 <sup>2</sup>                                                                                  | Rhinovirus C                                                | 3                       | Clinical (NP)            | (18)      |
| Outbreak of epidemic keratoconjunctivitis caused by human adenovirus type D53 in an eye care clinic — Los Angeles County, 2017 <sup>3</sup>                                                                                   | Human mastadenovirus D                                      | 8                       | Isolates                 | (19)      |
| Strengthening laboratory surveillance of viral pathogens: Experiences and lessons learned building next-generation sequencing capacity in Ghana <sup>4</sup>                                                                  | Enterovirus B                                               | 6                       | Isolates                 | (20)      |
| Characterization of novel reoviruses wad medani virus (orbivirus) and kundal virus (coltivirus) collected from <i>Hyalomma anatolicum</i> ticks in India during surveillance for Crimean Congo Hemorrhagic Fever <sup>5</sup> | Wad Medani virus, Kundal isolate (potential new Coltivirus) | 22                      | Tick pools               | (21)      |
| Molecular genotyping of hepatitis A virus, California, USA, 2017-2018 <sup>2</sup>                                                                                                                                            | Hepatovirus A                                               | 160                     | Clinical (serum)         | (22)      |
| Comparison of Illumina MiSeq and the Ion Torrent PGM and S5 platforms for whole-genome sequencing of picornaviruses and caliciviruses <sup>1</sup>                                                                            | Enterovirus C, Parechovirus A, Norovirus, Sapovirus         | 16                      | Isolates & Clinical (ST) | (23)      |
| Nearly complete genome sequence of an echovirus 30 strain from a cluster of Aseptic Meningitis cases in California, September 2017. <sup>1</sup>                                                                              | Enterovirus B                                               | 1                       | Clinical (CSF)           | (24)      |
| The effect of variant interference on de novo assembly for viral deep sequencing <sup>1</sup>                                                                                                                                 | Enterovirus A, Enterovirus B, Parechovirus A                | 4                       | Isolates & Clinical      | (25)      |

**Laboratories:**

<sup>1</sup> Division of Viral Diseases, CDC

<sup>2</sup> Viral and Rickettsial Disease Laboratory, CADPH

<sup>3</sup> Division of Viral Diseases, CDC/ Los Angeles County Department of Public Health/ Viral and Rickettsial Disease Laboratory, CADPH

<sup>4</sup> Noguchi Memorial Institute for Medical Research, Ghana/ Division of Viral Diseases, CDC

<sup>5</sup> National Institute for Virology, Pune, India/ Viral Special Pathogens Branch, DHCPP, CDC

\*Number of sequences reported in publication/deposited in GenBank.

Abbreviations - CDC: Centers for Disease Control and Prevention; CADPH: California Department of Public Health; DHCPP: Division of High Consequence Pathogens and Pathology; NP: Nasopharyngeal; ST: Stool

## REFERENCES

1. Ajami NJ, Wong MC, Ross MC, Lloyd RE, Petrosino JF. 2018. Maximal viral information recovery from sequence data using VirMAP. *Nat Commun* 9:3205.
2. Vilsker M, Moosa Y, Nooij S, Fonesca V, Ghysens Y, Dumon K, Pauwels R, Alcantara LC, Eynden EV, Vandamme A-M, Deforche K, de Oliveira T. 2019. Genome Detective: an automated system for virus identification from high-throughput sequencing data. *Bioinformatics* 35:871-873.
3. Shintani T, Ghosh S, Wang Y-H, Zhou X, Zhou D-J, Kobayashi N. 2012. Whole genomic analysis of human G1P[8] rotavirus strains from different age groups in China. *Viruses* 4:1289-1304.
4. Wang Y-H, Pang B-B, Ghosh S, Zhou X, Shintani T, Urushibara N, Song Y-W, He M-Y, Liu M-Q, Tang W-F, Peng J-S, Hu Q, Zhou D-J, Kobayashi N. 2014. Molecular epidemiology and genetic evolution of the whole genome of G3P[8] human rotavirus in Wuhan, China, from 2000 through 2013. *PLoS ONE* 9:e88850.
5. Fischer N, Indenbirken D, Meyer T, Lütgehetmann M, Lellek H, Spohn M, Aepfelbacher M, Alawi M, Grundhoff A. 2015. Evaluation of unbiased next-generation sequencing of RNA (RNA-seq) as a diagnostic method in influenza virus-positive respiratory samples. *Journal of Clinical Microbiology* 53:2238-2250.
6. Montmayeur AM, Ng TF, Schmidt A, Zhao K, Magana L, Iber J, Castro CJ, Chen Q, Henderson E, Ramos E, Shaw J, Tatusov RL, Dybdahl-Sissoko N, Endegue-Zanga MC, Adeniji JA, Oberste MS, Burns CC. 2017. High-throughput next-generation sequencing of polioviruses. *J Clin Microbiol* 55:606-615.
7. Ng TF, Montmayeur A, Castro C, Cone M, Stringer J, Lamson DM, Rogers SL, Wang Chern SW, Magana L, Marine R, Rubino H, Serinaldi D, George KS, Nix WA. 2016. Detection and genomic characterization of enterovirus D68 in respiratory samples isolated in the United States in 2016. *Genome Announc* 4:e01350-16.
8. Magana LC, Espinosa A, Marine RL, Ng TFF, Castro CJ, Montmayeur AM, Hacker JK, Scott S, Whyte T, Bankamp B, Oberste MS, Rota PA. 2017. Complete genome sequences of mumps and measles virus isolates from three states in the United States. *Genome Announc* 5:e00748-17.
9. Marine R, Castro C, Magana L, Ng TF, Aswath K, Collins N, Park GW, Vinje J, Oberste MS. 2017. Genomic characterization of three melon necrotic spot viruses detected in human stool specimens. *Genome Announc* 5:e01758-16.
10. Ng TF, Magana L, Montmayeur A, Lopez MR, Gregoricus N, Oberste MS, Vinje J, Nix WA. 2016. Characterization of a salivirus (*Picornaviridae*) from a diarrheal child in Guatemala. *Genome Announc* 4:e01751-15.
11. Castro CJ, Reynolds E, Monroe SS, Marine RL, Vinje J. 2019. Complete genome sequences of human astrovirus prototype strains (types 1 to 8). *Microbiol Resour Announc* 8:e01611-18.
12. Cannon JL, Barclay L, Collins NR, Wikswa ME, Castro CJ, Magana LC, Gregoricus N, Marine RL, Chhabra P, Vinje J. 2017. Genetic and epidemiologic trends of norovirus outbreaks in the United States from 2013 to 2016 demonstrated emergence of novel GII.4 recombinant viruses. *J Clin Microbiol* 55:2208-2221.
13. Chhabra P, Aswath K, Collins N, Ahmed T, Olortegui MP, Kosek M, Cebelinski E, Cooper PJ, Bucardo F, Lopez MR, Castro CJ, Marine RL, Ng TFF, Vinje J. 2018. Near-complete genome sequences of several new norovirus genogroup II genotypes. *Genome Announc* 6:e00007-18.

14. Hull JJ, Marthaler D, Rossow S, Ng TF, Montmayeur AM, Magana L, Moon SS, Jiang B. 2016. Genomic sequence of the first porcine rotavirus group H strain in the United States. *Genome Announc* 4:e01763-15.
15. Diez-Valcarce M, Castro CJ, Marine RL, Halasa N, Mayta H, Saito M, Tsaknaridis L, Pan CY, Bucardo F, Becker-Dreps S, Lopez MR, Magana LC, Ng TFF, Vinje J. 2018. Genetic diversity of human sapovirus across the Americas. *J Clin Virol* 104:65-72.
16. Diez-Valcarce M, Montmayeur A, Tatusov R, Vinje J. 2019. Near-complete human sapovirus genome sequences from Kenya. *Microbiol Resour Announc* 8:e01602-18.
17. Pan CY, Padilla T, Yagi S, Lewis LS, Ng TFF, Marine RL, Nix WA, Wadford DA. 2018. Whole-genome sequence of human rhinovirus C47, isolated from an adult respiratory illness outbreak in Butte County, California, 2017. *Genome Announc* 6:e01579-17.
18. Pan CY, Yagi S, Padilla T, Fei Fan Ng T, Marine RL, Nix WA, Wadford DA. 2018. Genome sequences of rhinovirus genotype C56 detected in three patients with acute respiratory illness, California, 2016 to 2017. *Microbiol Resour Announc* 7:e00982-18.
19. OYong K, Killerby M, Pan C-Y, Huynh T, Green NM, Wadford DA, Terashita D. 2018. Outbreak of epidemic keratoconjunctivitis caused by human adenovirus type D53 in an eye care clinic — Los Angeles County, 2017. *Morbidity and Mortality Weekly Report* 67:1347-1349.
20. Marine RL, Ntim NAA, Castro CJ, Attiku KO, Pratt D, Duker E, Agbosu E, Ng TFF, Gatei W, Obodai E, Odoom JK, Walker CL, Rota PA, Oberste MS, Ampofo WK, Balajee SA. 2019. Strengthening laboratory surveillance of viral pathogens: Experiences and lessons learned building next-generation sequencing capacity in Ghana. *Int J Infect Dis* 81:231-234.
21. Yadav PD, Whitmer SLM, Sarkale P, Fei Fan Ng T, Goldsmith CS, Nyayanit DA, Esona MD, Shrivastava-Ranjan P, Lakra R, Pardeshi P, Majumdar TD, Francis A, Klena JD, Nichol ST, Stroher U, Mourya D. 2019. Characterization of novel reoviruses wad medani virus (orbivirus) and kundal virus (coltivirus) collected from *Hyalomma anatolicum* ticks in India during surveillance for Crimean Congo Hemorrhagic Fever. *J Virol* 93:e00106-19.
22. Probert WS, Gonzalez C, Espinosa A, Hacker JK. 2019. Molecular genotyping of hepatitis A virus, California, USA, 2017-2018. *Emerging Infectious Diseases* 25:1594-1596.
23. Marine RL, Magaña LC, Castro CJ, Zhao K, Montmayeur AM, Schmidt A, Diez-Valcarce M, Ng TFF, Vinje J, Burns CC, Nix WA, Rota PA, Oberste MS. 2020. Comparison of Illumina MiSeq and the Ion Torrent PGM and S5 platforms for whole-genome sequencing of picornaviruses and caliciviruses. *Journal of Virological Methods* 280:113865.
24. Pan C-Y, Huynh T, Padilla T, Chen A, Ng T, Marine R, Castro C, Nix WA, Wadford DA. 2019. Nearly complete genome sequence of an echovirus 30 strain from a cluster of Aseptic Meningitis cases in California, September 2017. *Microbiol Resour Announc* 8:e01085-19.
25. Castro CJ, Marine RL, Ramos E, Ng TFF. 2020. The effect of variant interference on de novo assembly for viral deep sequencing. *BMC Genomics* 21:421.
